# Supplementary material for: Chromatin states shaped by an epigenetic code confer regenerative potential to the mouse liver
Source: PubMed Central journal article supplement (PMC8257577; doi:10.1038/s41467-021-24466-1), 2021-07-05
Supplement: 41467_2021_24466_MOESM1_ESM.pdf [file 41467_2021_24466_MOESM1_ESM.pdf]

# Suppl. Fig1

a

|  | E-S1   | E-S2   | E-S3   | E-S4   | E-S5   | E-S6   |            |
|--|--------|--------|--------|--------|--------|--------|------------|
|  | 0.2828 | 0.0158 | 0.0027 | 0.0043 | 0.0025 | 0.0030 | E-POLR2A   |
|  | 0.9542 | 0.0145 | 0.0002 | 0.0003 | 0.0000 | 0.0025 | E-H3K4me3  |
|  | 0.6606 | 0.4932 | 0.0032 | 0.0076 | 0.0005 | 0.0061 | E-H3K27ac  |
|  | 0.3395 | 0.7234 | 0.0431 | 0.0206 | 0.0008 | 0.0279 | E-H3K4me   |
|  | 0.3353 | 0.2854 | 0.1719 | 0.1052 | 0.0063 | 0.0368 | E-H3K79me3 |
|  | 0.0406 | 0.1312 | 0.0546 | 0.7542 | 0.0008 | 0.0009 | E-H3K36me3 |
|  | 0.1581 | 0.0235 | 0.0149 | 0.0177 | 0.0212 | 0.1855 | E-H3K27me3 |

b

Genome Fraction (Encode data)

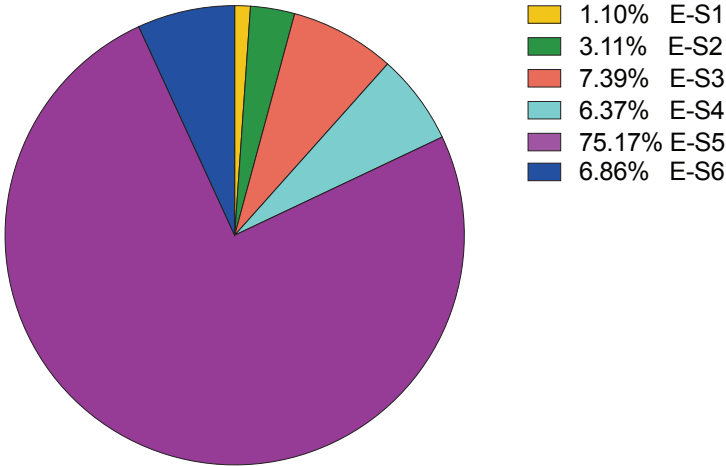

## Supplementary Figure 1. Mouse ENCODE data defines 6 chromatin states in the liver

a. Heatmap of the emission parameters shows chromatin mark combinations associated with each state.  
 b. The fraction of mouse liver genome region shared by each state.

# Suppl. Fig2

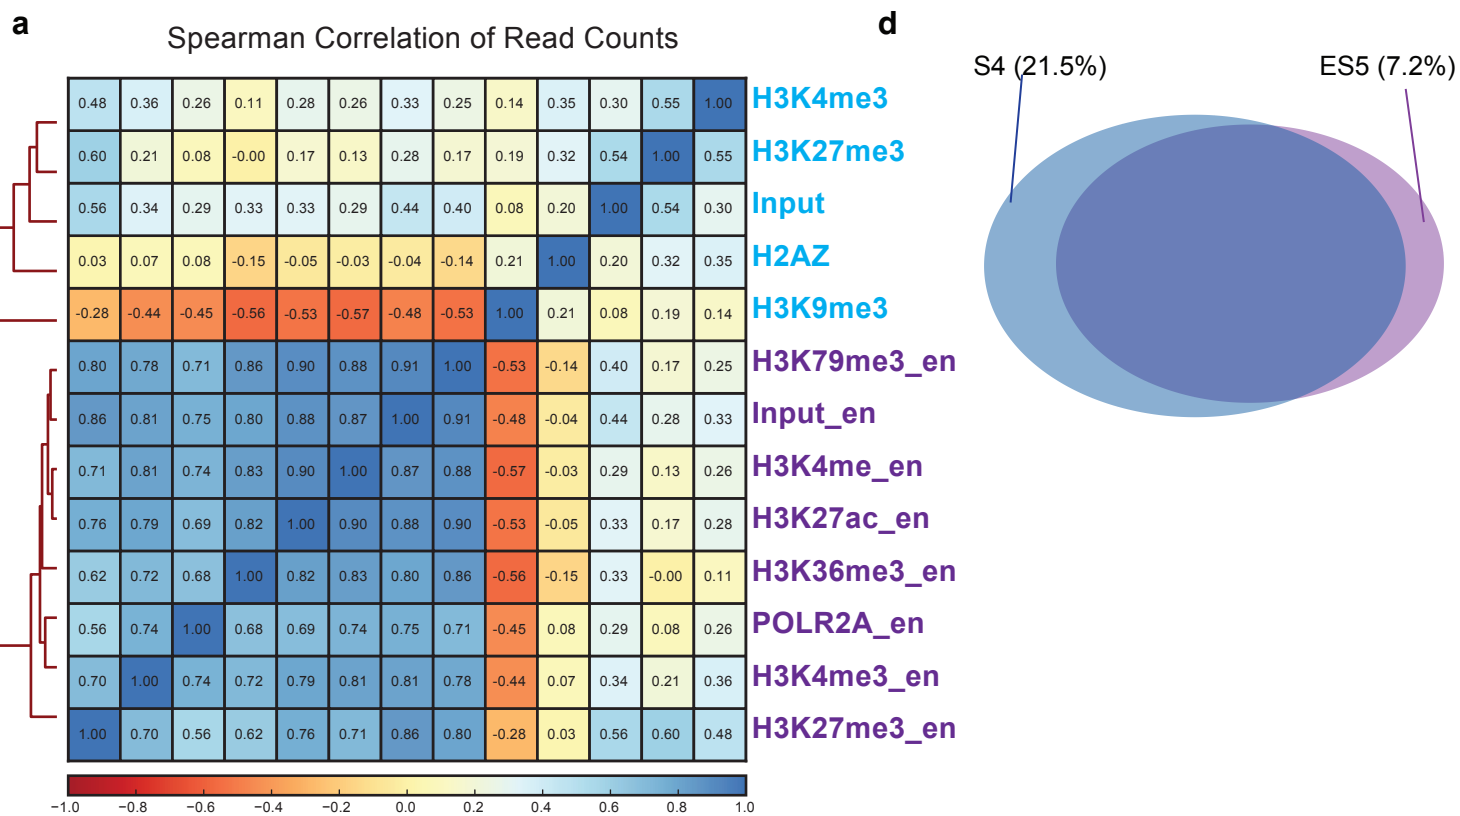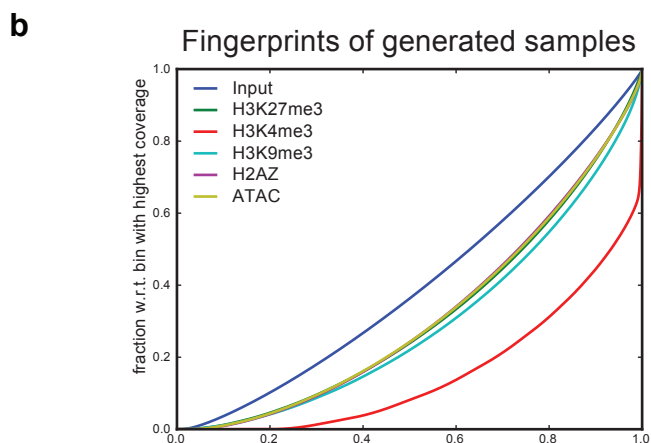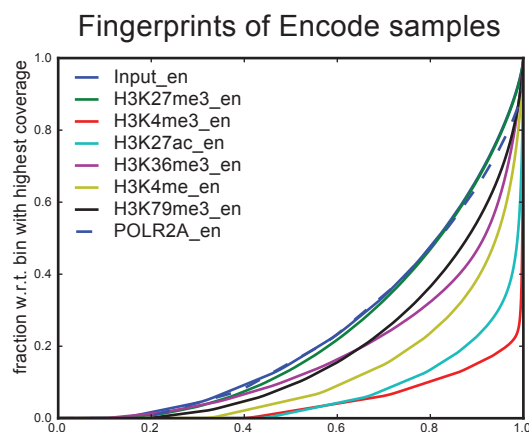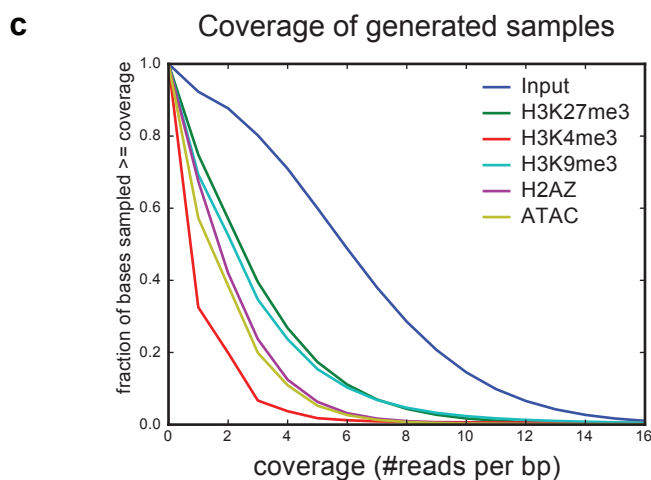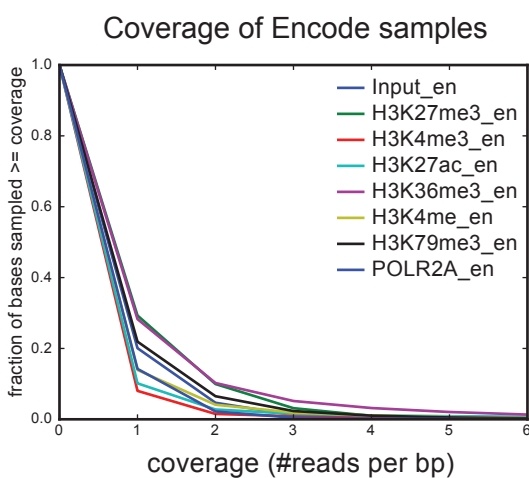

## Supplementary Figure 2. Comparative analysis of in-house datasets and ENCODE datasets

a. Spearman correlation of histone markers compared to ENCODE datasets.

b. Fingerprints of in-house data set and ENCODE data set show enrichment quality of each markers.

c. Coverage comparison between the datasets generated in this study and ENCODE datasets.

d. Overlap of predicted empty states from two datasets cross validated the chromatin states prediction.

# Suppl. Fig3

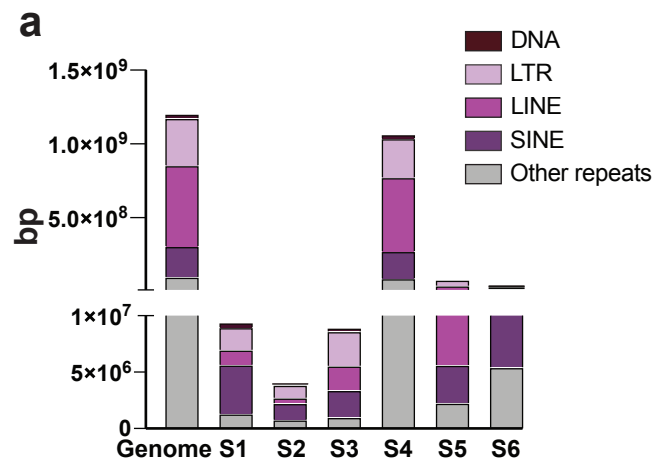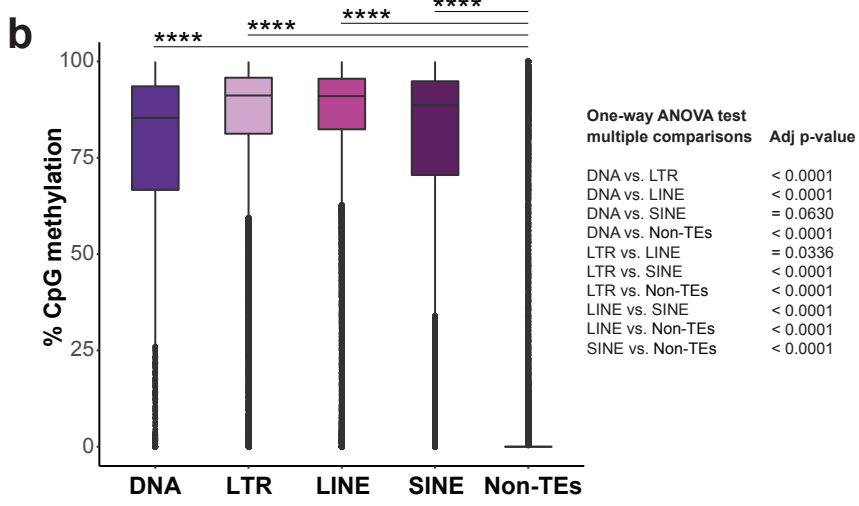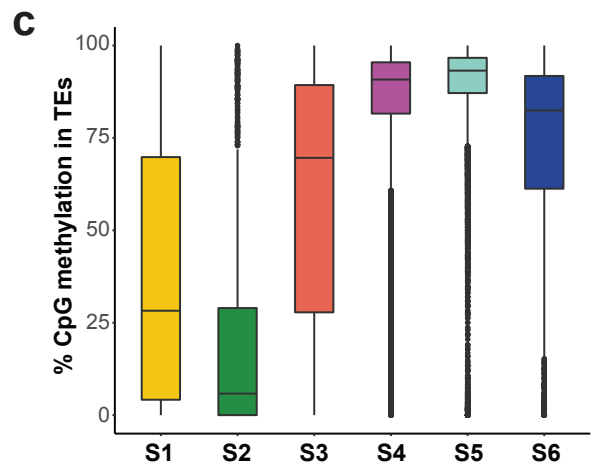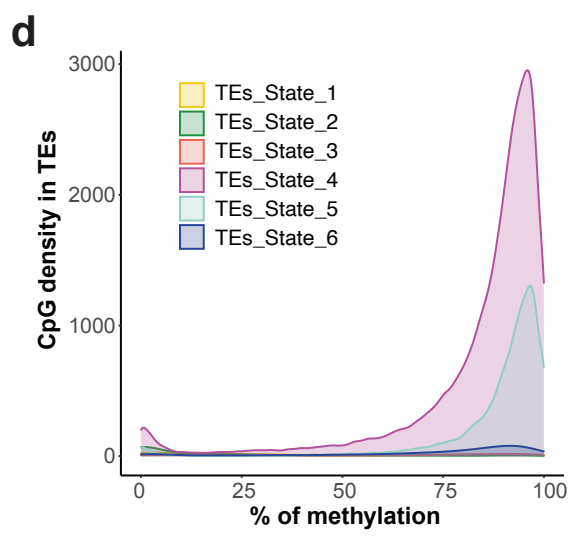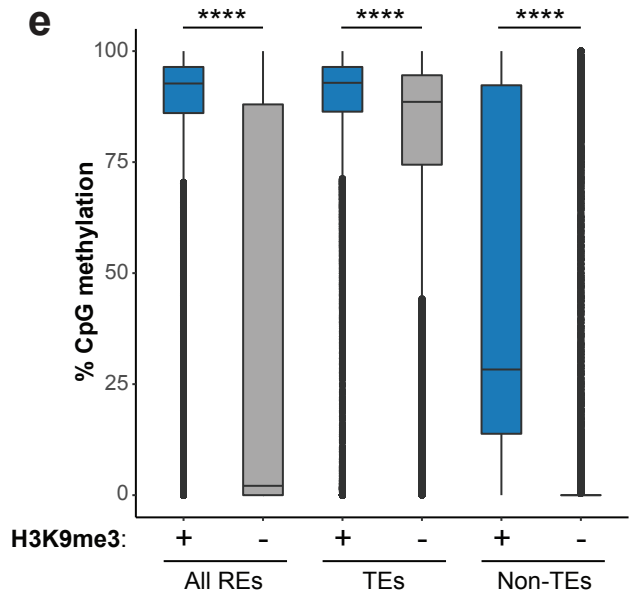

**Supplementary Figure 3. DNA methylation, H3K9me3 and H3K27me3 occupancy of transposable elements in the mouse liver.**

**a.** TEs annotation of mm10 reference genome and in each chromatin state.

**b.** Percentage of DNA methylation across TE subclasses (DNA, LTR, SINE and LINE and other repetitive elements) shows that TEs are more methylated compared to other repetitive elements. p-values were calculated by one way ANOVA adjusted with a Tukey multiple comparison test. Adjusted p-values are indicated on the figure. **c.** Percentage of DNA methylation of TE subclasses

in each state showing that TEs present in S4 and S5 are more methylated compared to the ones in other states. **d.** Density plot of CpGs detected in the eRRBS data in TEs divided by each chromatin state shows that the vast majority of CpGs are in S4 and S5 and they are highly methylated. A small fraction of CpGs is present in S1, S2, S3 and S6. **e.** Box plot of DNA methylation of repetitive elements occupied by H3K9me3 shows that the TEs occupied by H3K9me3 are more methylated than TEs without H3K9me3. Two-sided p-values are calculated by unpaired non-parametric Mann-Whitney test. \*\*\*\* means p-value < 0.0001. Data in **b-c-e** are represented as box-and-whisker plots where center lines are the medians, the lower and upper hinges correspond to the first and third quartiles, the whiskers extend from the hinges respectively to the largest or smallest values no further than  $1.5 \times$  IQR (inter-quartile range), while data beyond the end of the whiskers are outlying points that are plotted individually.

Suppl. Fig4

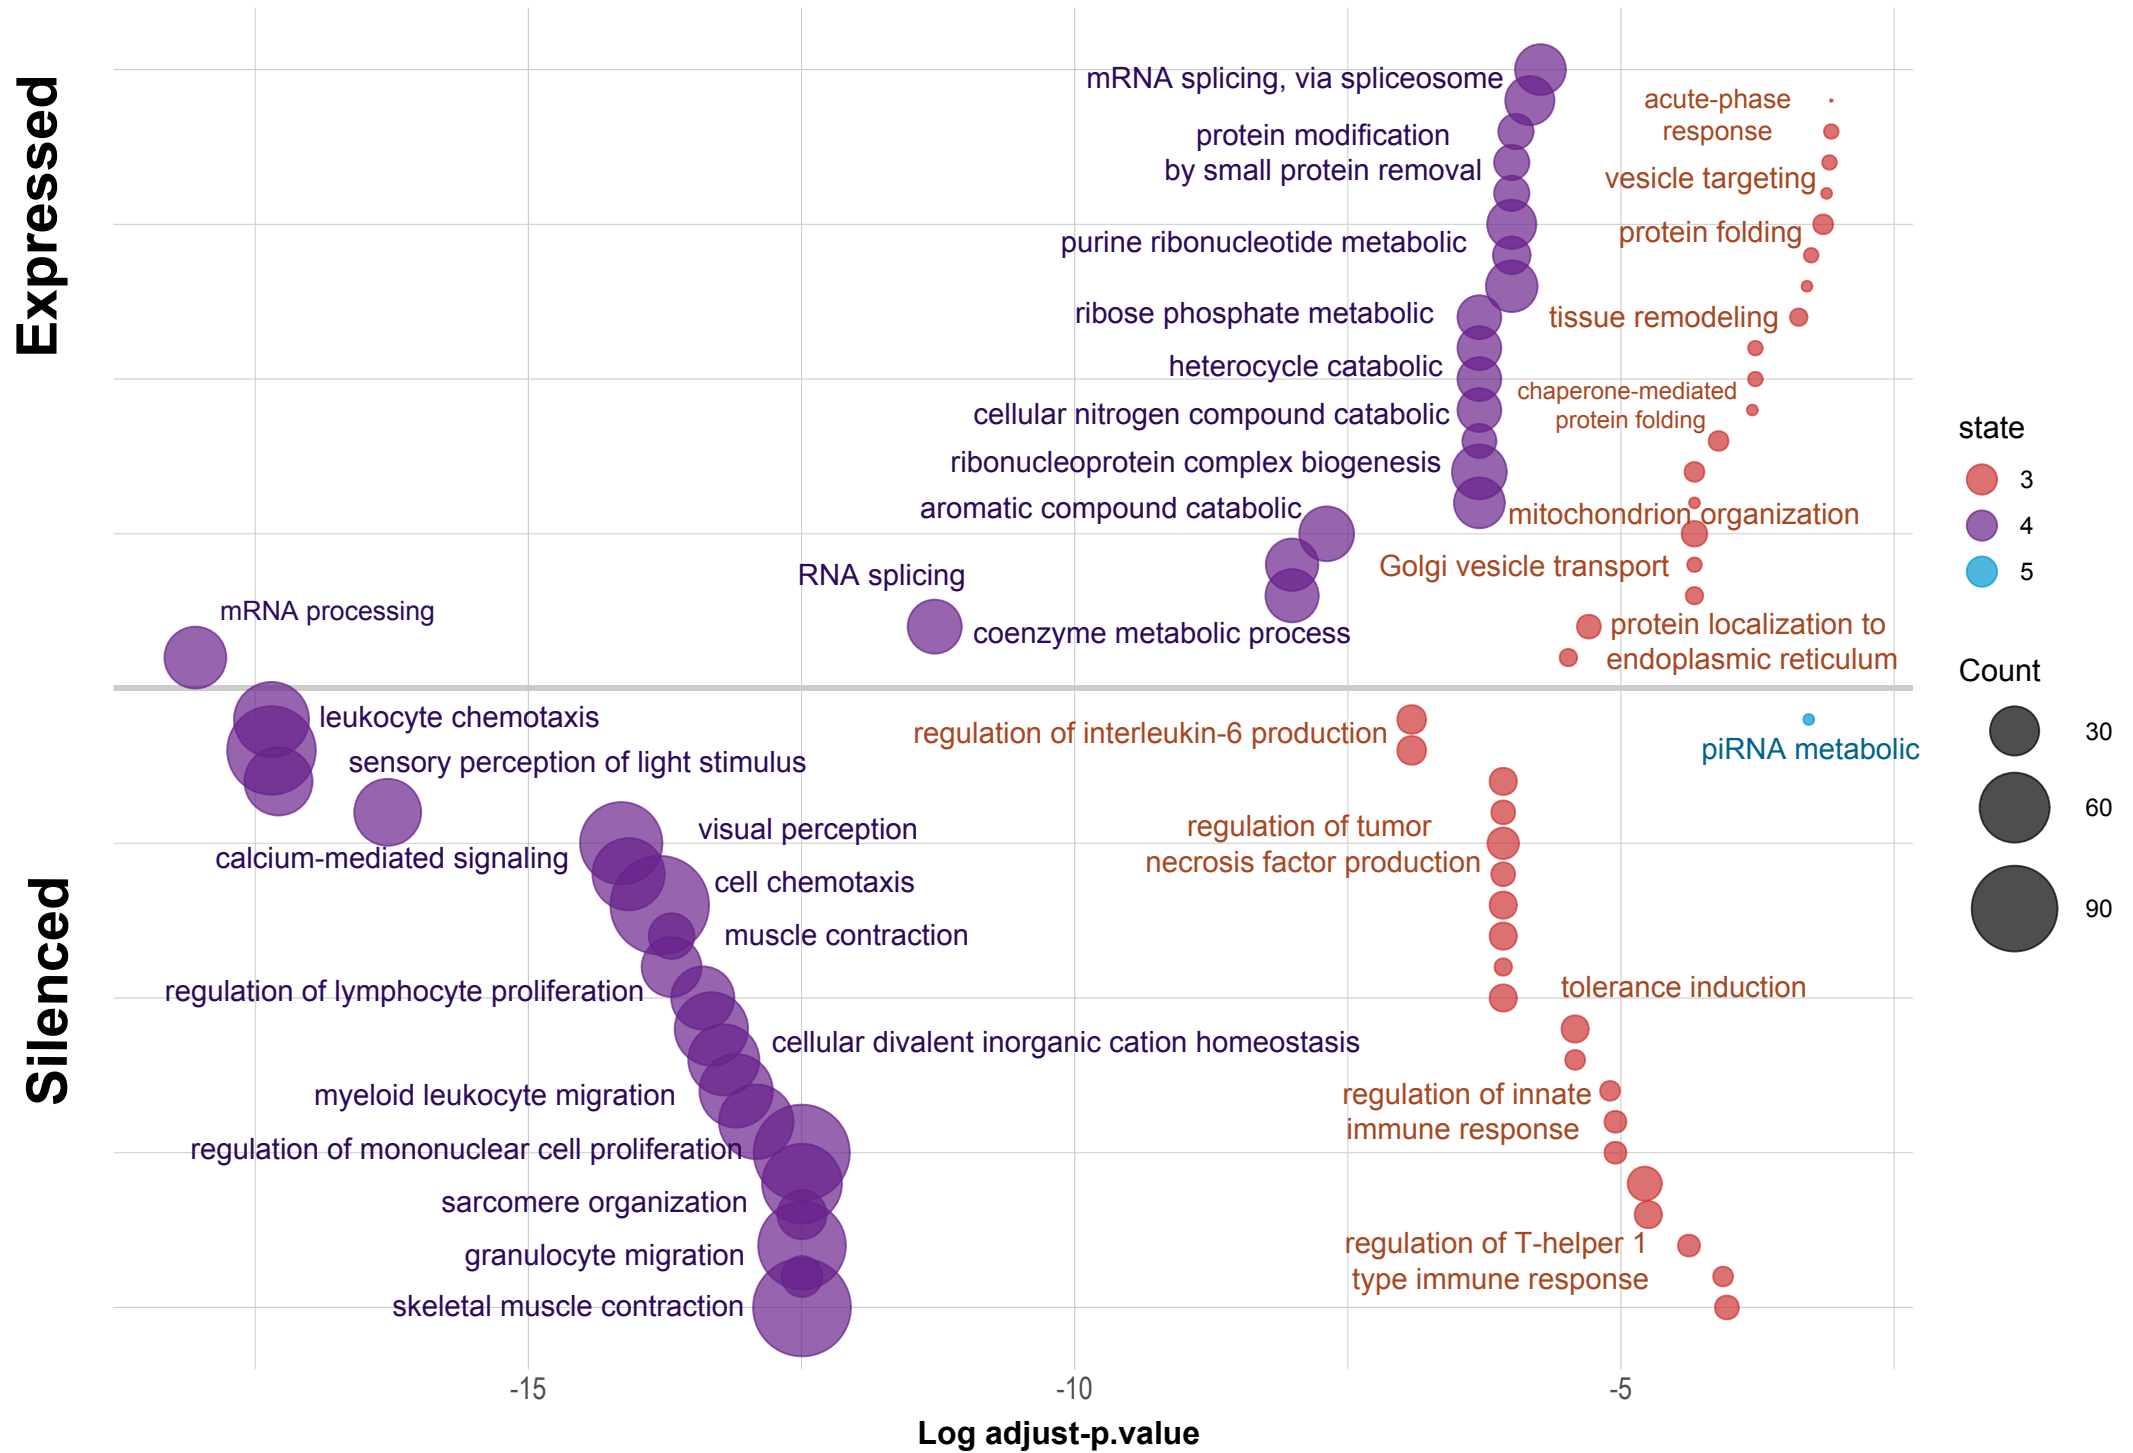

**Supplementary Figure 4. Gene functions are segregated into distinct chromatin states.**

Significant GO pathways represented as expressed and silenced in S3, S4 and S5. The bubble color and size correspond to state and gene number, respectively. Note that state 5 has only 132 genes and of these, only a few are grouped by function.

# Suppl. Fig5

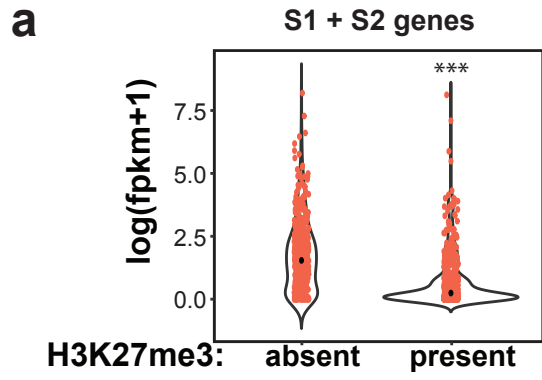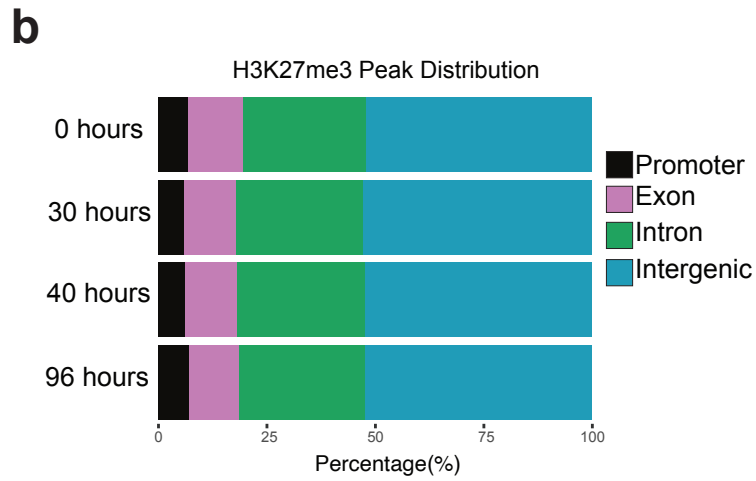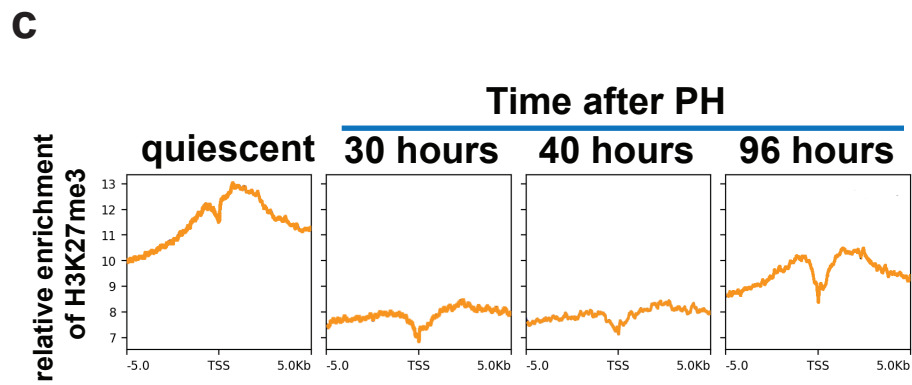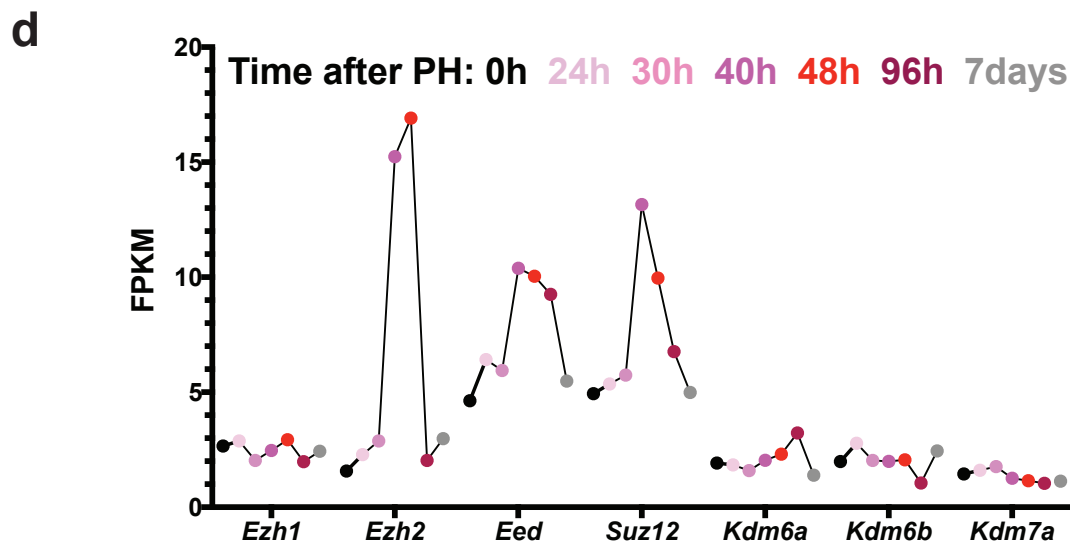

**Supplementary Figure 5. H3K27me3 redistribution across the hepatic genome during liver regeneration.**

- a.** Expression of genes from S1 and S2 categorized based on presence or absence of H3K27me3 occupancy at the TSS. Genes marked with H3K27me3 are significantly lower than those without; Welch t-test was performed on log transformed fpkm in R, \*\*\* indicates p-value < 2.2e-16 by two-side t-test.
- b.** Annotation of genomic elements occupied by H3K27me3 peaks at 4 time points after PH.
- c.** H3K27me3 enrichment profiling across the TSS of all genes in quiescent and regenerating livers.
- d.** FPKM values of H3K27me3 methyltransferases and demethylases after PH based on RNAseq analysis.



# Suppl. Fig6

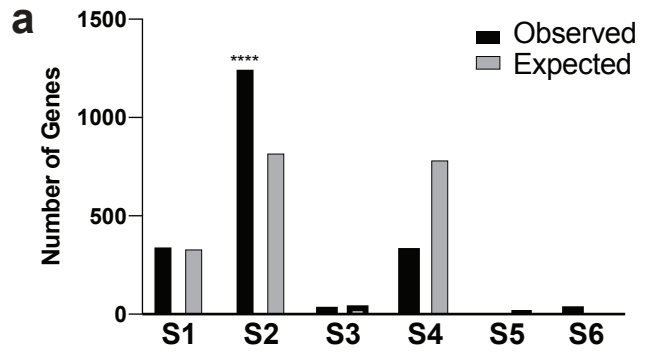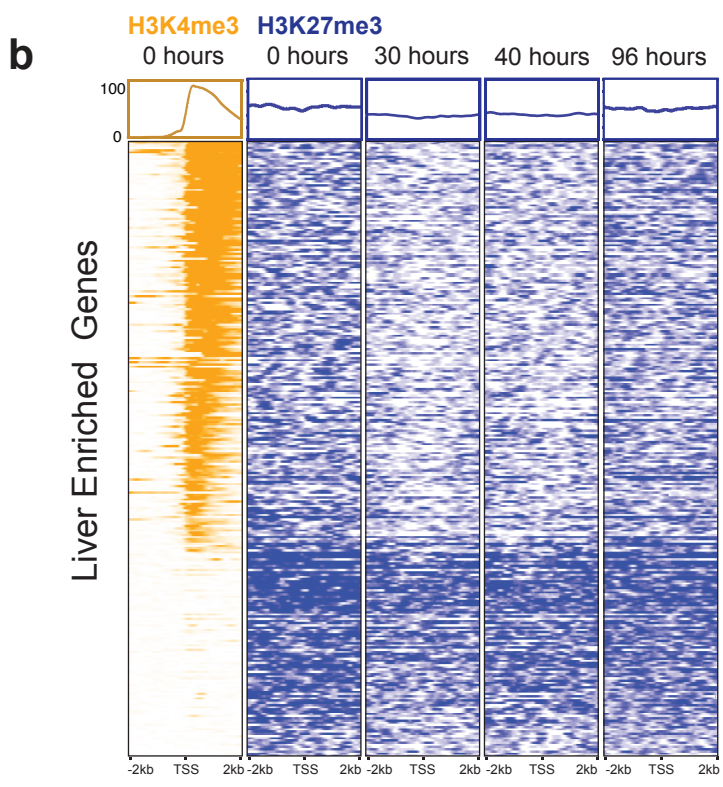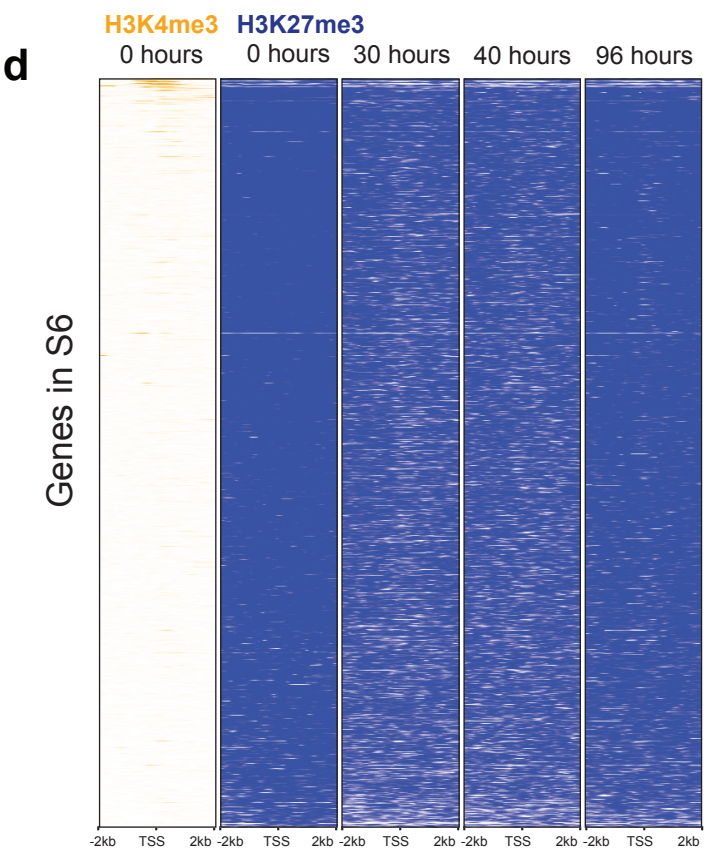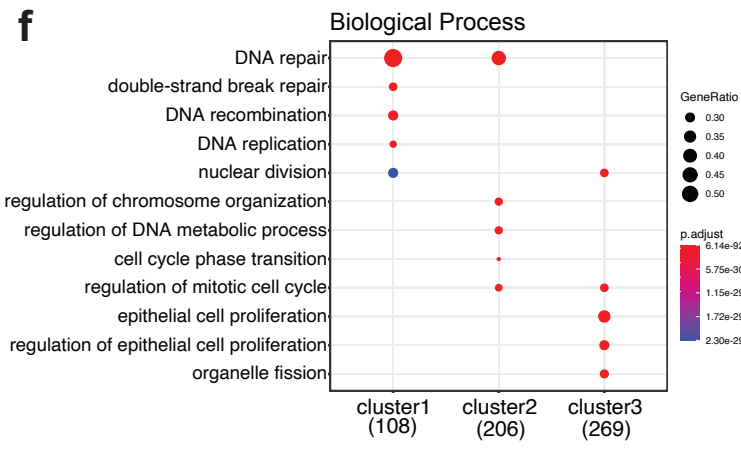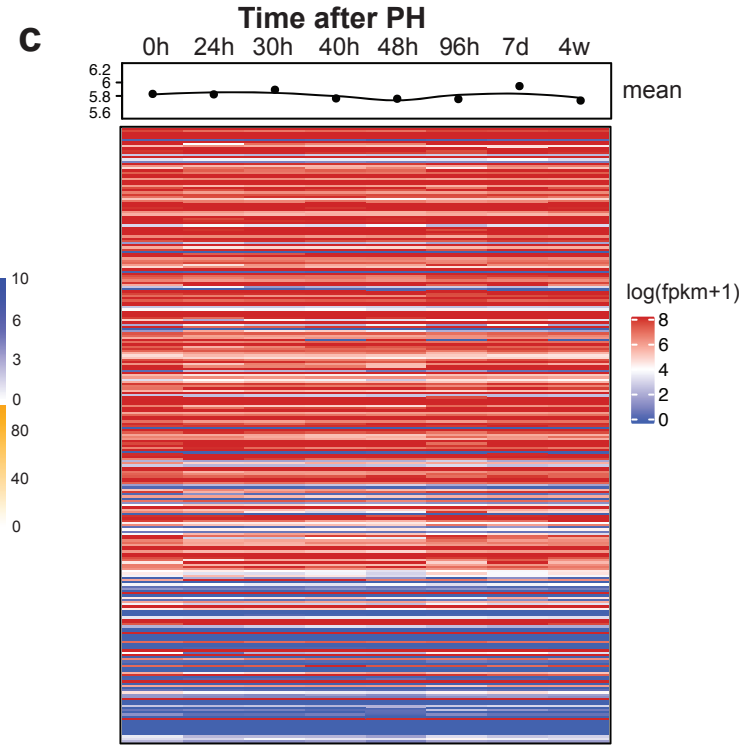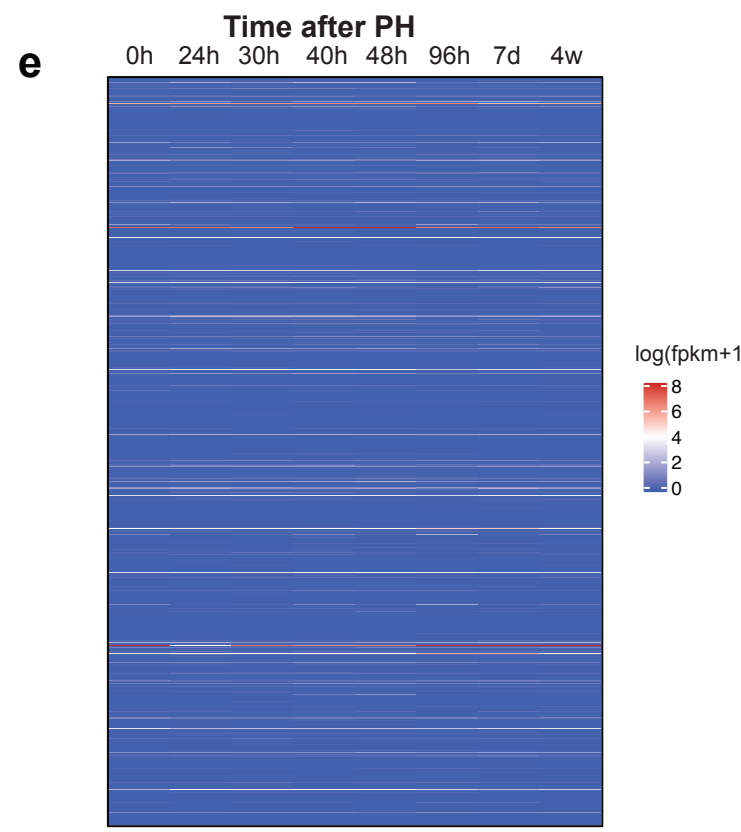

**Supplementary Figure 6. Expression of genes from states and functional category during regeneration.**

- a.** Actual numbers of expressed genes verses expected number of genes calculated from the total genes in each state.
- b.** H3K4me3 and H3K27me3 occupancy across the TSS of liver enriched genes in quiescent livers and H3K27me3 occupancy at 0, 30, 40 and 96 hours after PH.
- c.** Heatmap of liver enriched genes showing that they are consistently expressing during regeneration.
- d.** H3K4me3 and H3K27me3 occupancy across the TSS of all genes in S6 at 0 and H3K27me3 occupancy at 0, 30, 40 and 96 hours after PH.
- e.** Heatmap of all genes in S6 shows that they are not re-expressed during regeneration.
- f.** significant GO terms in 3 clusters, top 5 GO categories that don't include all clusters are shown.

# Suppl. Fig7

a

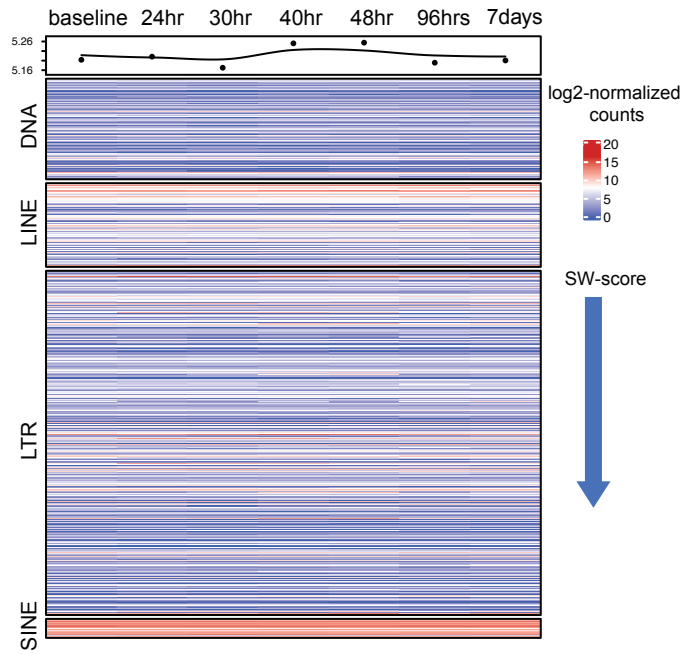

b

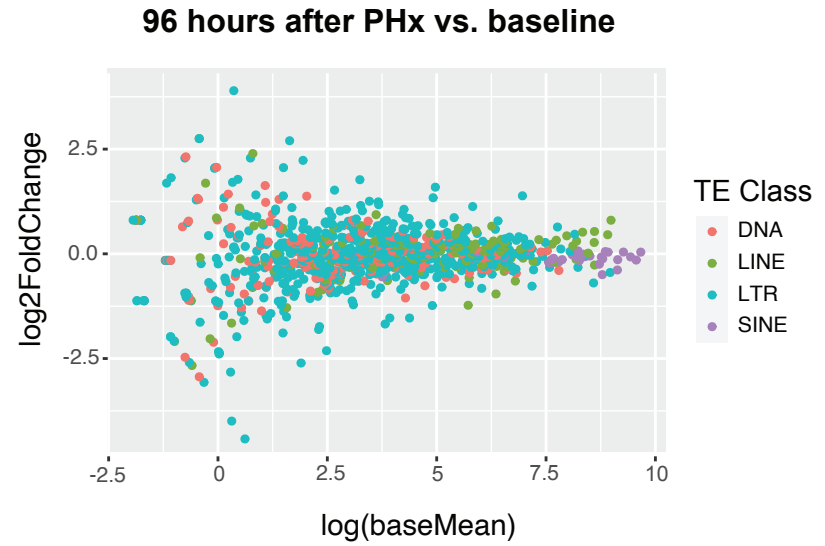

c

Total= 12,579,281 CpGs  
96 hours after PH vs. baseline

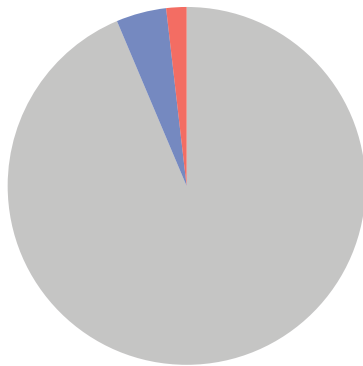

93.64% Unchanged CpG  
4.53% Hypo CpG-10  
1.83% Hyper CpG-10

d

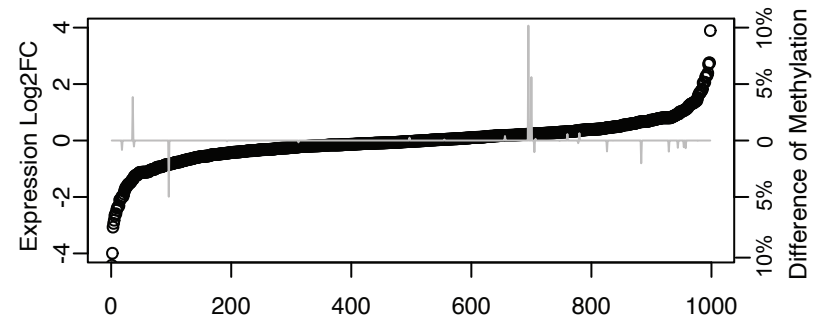

## Supplementary Figure 7. TE expression during liver regeneration and correlation with DNA methylation.

- Expression heatmap of annotated TEs at 7 time points during liver regeneration, categorized into classes and rank ordered by age (sw-score).
- MAplot showing differential expression of TEs segregated by class at comparing 0 and 96 hours after PH.
- The difference of CpG methylation between 96 hours after PH and 0.
- Integration of TE expression change and TE methylation change, log2 transformed expression FC of 96 compared to 0 aligning with difference of methylation.

Suppl. Fig8

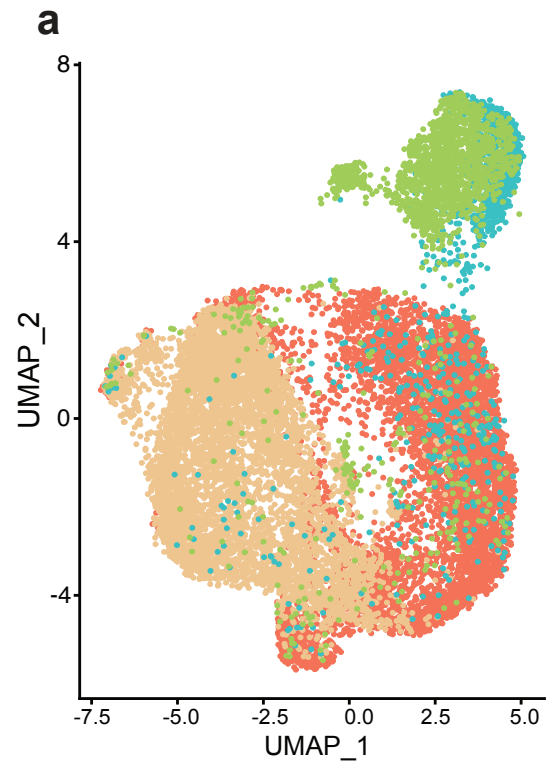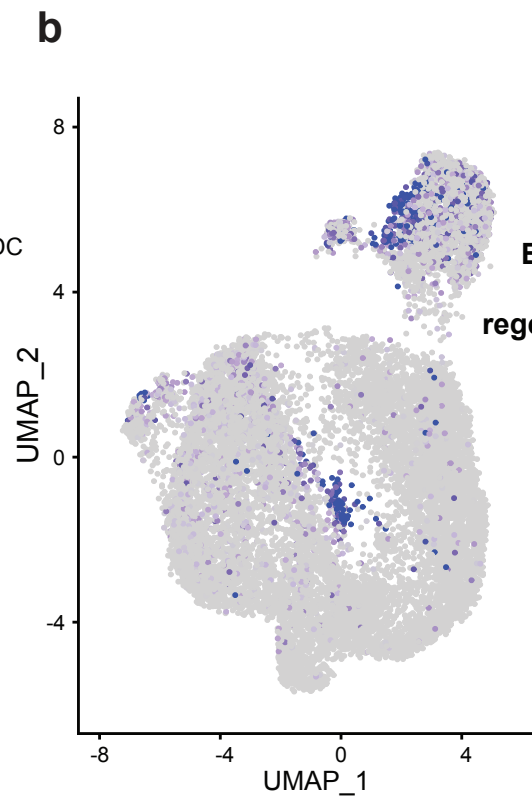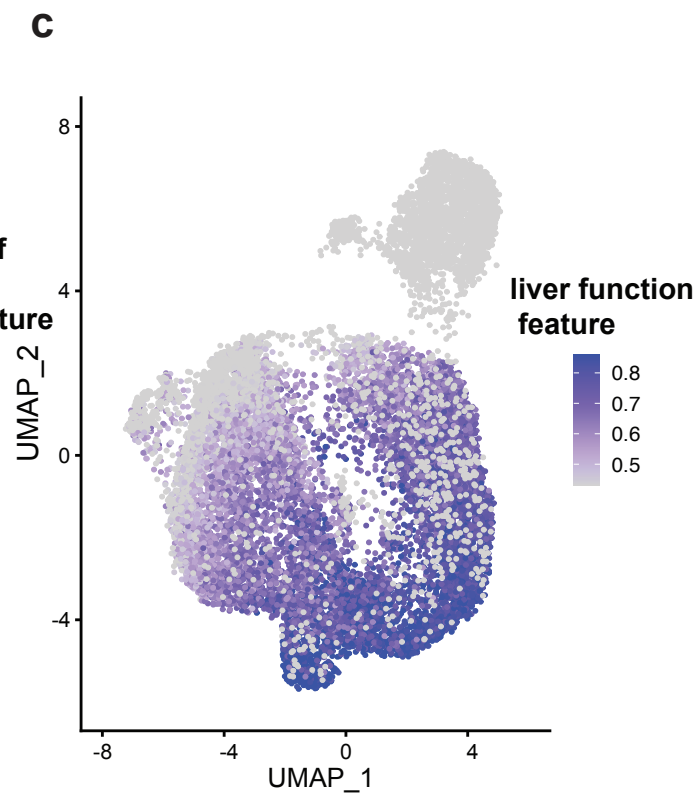

**d** 1881 genes enriched in open chromatin in LPLCs

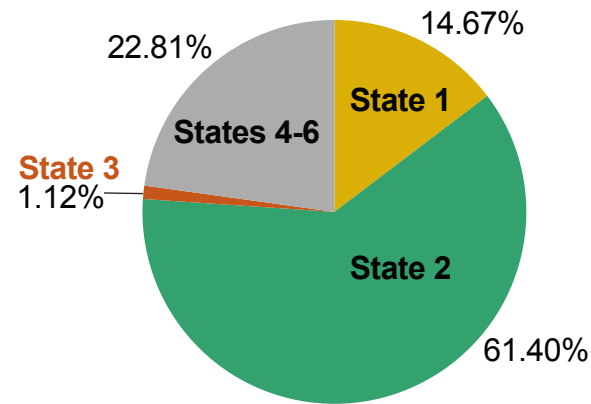

**Supplementary Figure 8. Heterogeneity of regenerative potentials response to liver injury.**

- a.** Uniform Manifold Approximation and Projection (UMAP) was used as a dimension reduction tool to visualize the complex connections among the cells. Distribution of healthy hepatocytes and biliary epithelial cells (BECs), injury hepatocytes and BECs are shown in the UMAP as colored by each cell type.
- b.** Expression level of the regenerative gene feature which compresses the expression levels of all the genes examined in Figure 5E into a single value and are plotted on the same UMAP reduction.
- c.** Expression level of the liver function gene feature in the same UMAP reduction
- d.** Distribution of the 1881 genes enriched in open chromatin status from liver progenitor like cells (LPLC) falling into open chromatin states S1, S2 and S3.

**Table S1 Sequencing data set summary**

| <b>Sample Name</b>                        | <b>Reads</b>   | <b>Align Rate</b> | <b>Library Prep</b> | <b>Called Peaks</b> | <b>GEO Accession</b> |
|-------------------------------------------|----------------|-------------------|---------------------|---------------------|----------------------|
| baseline WT ATAC                          | 63,811,006.00  | 97.49%            | PE                  | 23,943              | GSM4634005           |
| baseline WT_b_H2az                        | 61,446,619.00  | 99.45%            | SE                  | 99,226              | GSM4634007           |
| baseline WT H3K9me3 (round 2)             | 124,010,776.00 | 90.53%            | PE                  | 123,180             | GSM3753284           |
| baseline WT H3K4me3 (round 2)             | 60,208,280.00  | 99.28%            | PE                  | 35,334              | GSM3753286           |
| Regenerating WT H3K27me3 - 0hr (round 3)  | 82,659,374.00  | 93.87%            | PE                  | 343,983             | GSM3753289           |
| Regenerating WT H3K27me3 - 30hr (round 3) | 67,682,622.00  | 99.97%            | PE                  | 340,301             | GSM3753290           |
| Regenerating WT H3K27me3 - 40hr (round 3) | 63,809,278.00  | 99.96%            | PE                  | 274,886             | GSM3753291           |
| Regenerating WT H3K27me3 - 96hr (round 3) | 77,672,450.00  | 99.96%            | PE                  | 255,970             | GSM3753292           |
